# Supplementary material for: Ilimaquinone Induces Apoptosis and Autophagy in Human Oral Squamous Cell Carcinoma Cells
Source: PubMed Central journal article supplement (PMC7555415; doi:10.3390/biomedicines8090296), 2020-08-20
Supplement: biomedicines-08-00296-s001.pdf [file biomedicines-08-00296-s001.pdf]

# Supporting Information

## Table of Contents

- S1.  $^1\text{H}$  NMR spectrum of ilimaquinone in  $\text{CDCl}_3$  at 400 MHz.
- S2.  $^{13}\text{C}$  NMR spectrum of ilimaquinone in  $\text{CDCl}_3$  at 100 MHz.
- S3. HSQC spectrum of ilimaquinone in  $\text{CDCl}_3$ .
- S4. HMBC spectrum of ilimaquinone in  $\text{CDCl}_3$ .
- S5.  $^1\text{H}$ - $^1\text{H}$  COSY spectrum of ilimaquinone in  $\text{CDCl}_3$ .

KD28-15-4\_proton-1-2.jdf  
KD28-15-4

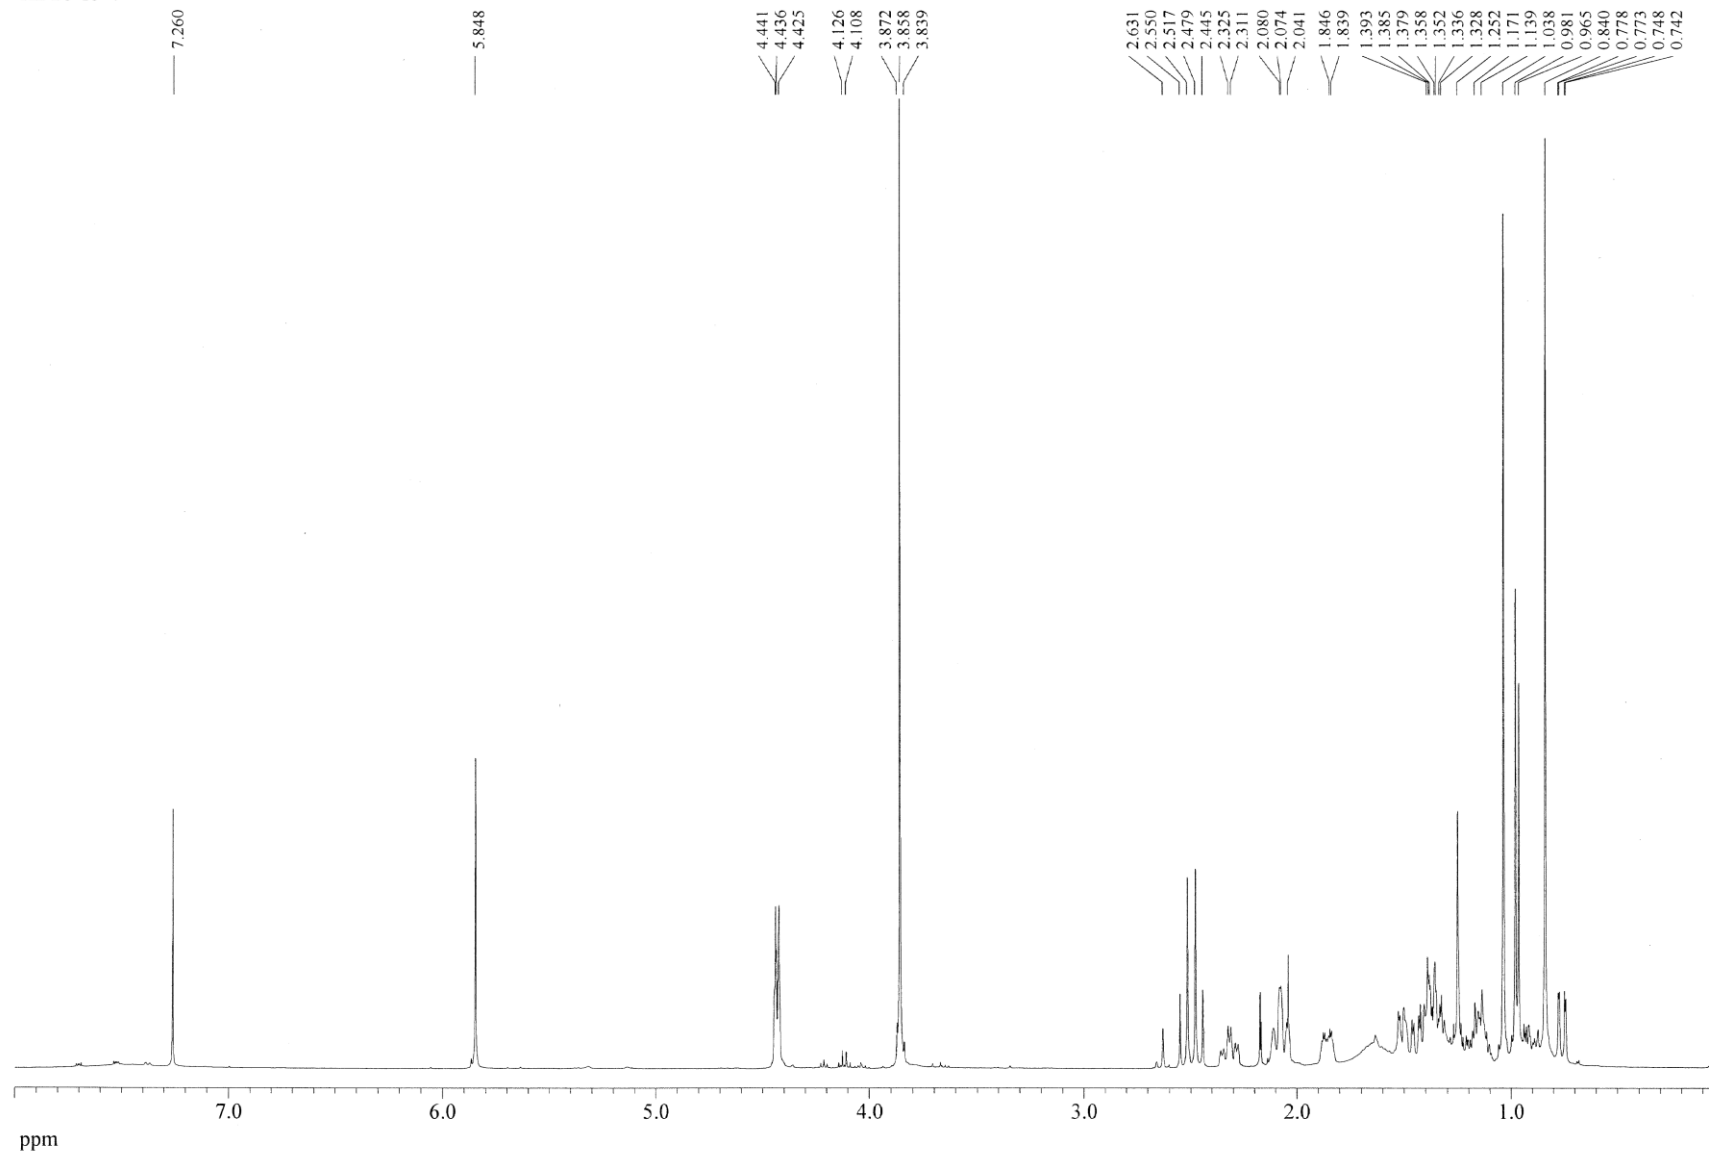

**S1.**  $^1\text{H}$  NMR spectrum of ilimaquinone in  $\text{CDCl}_3$  at 400 MHz.

KD28-15-4

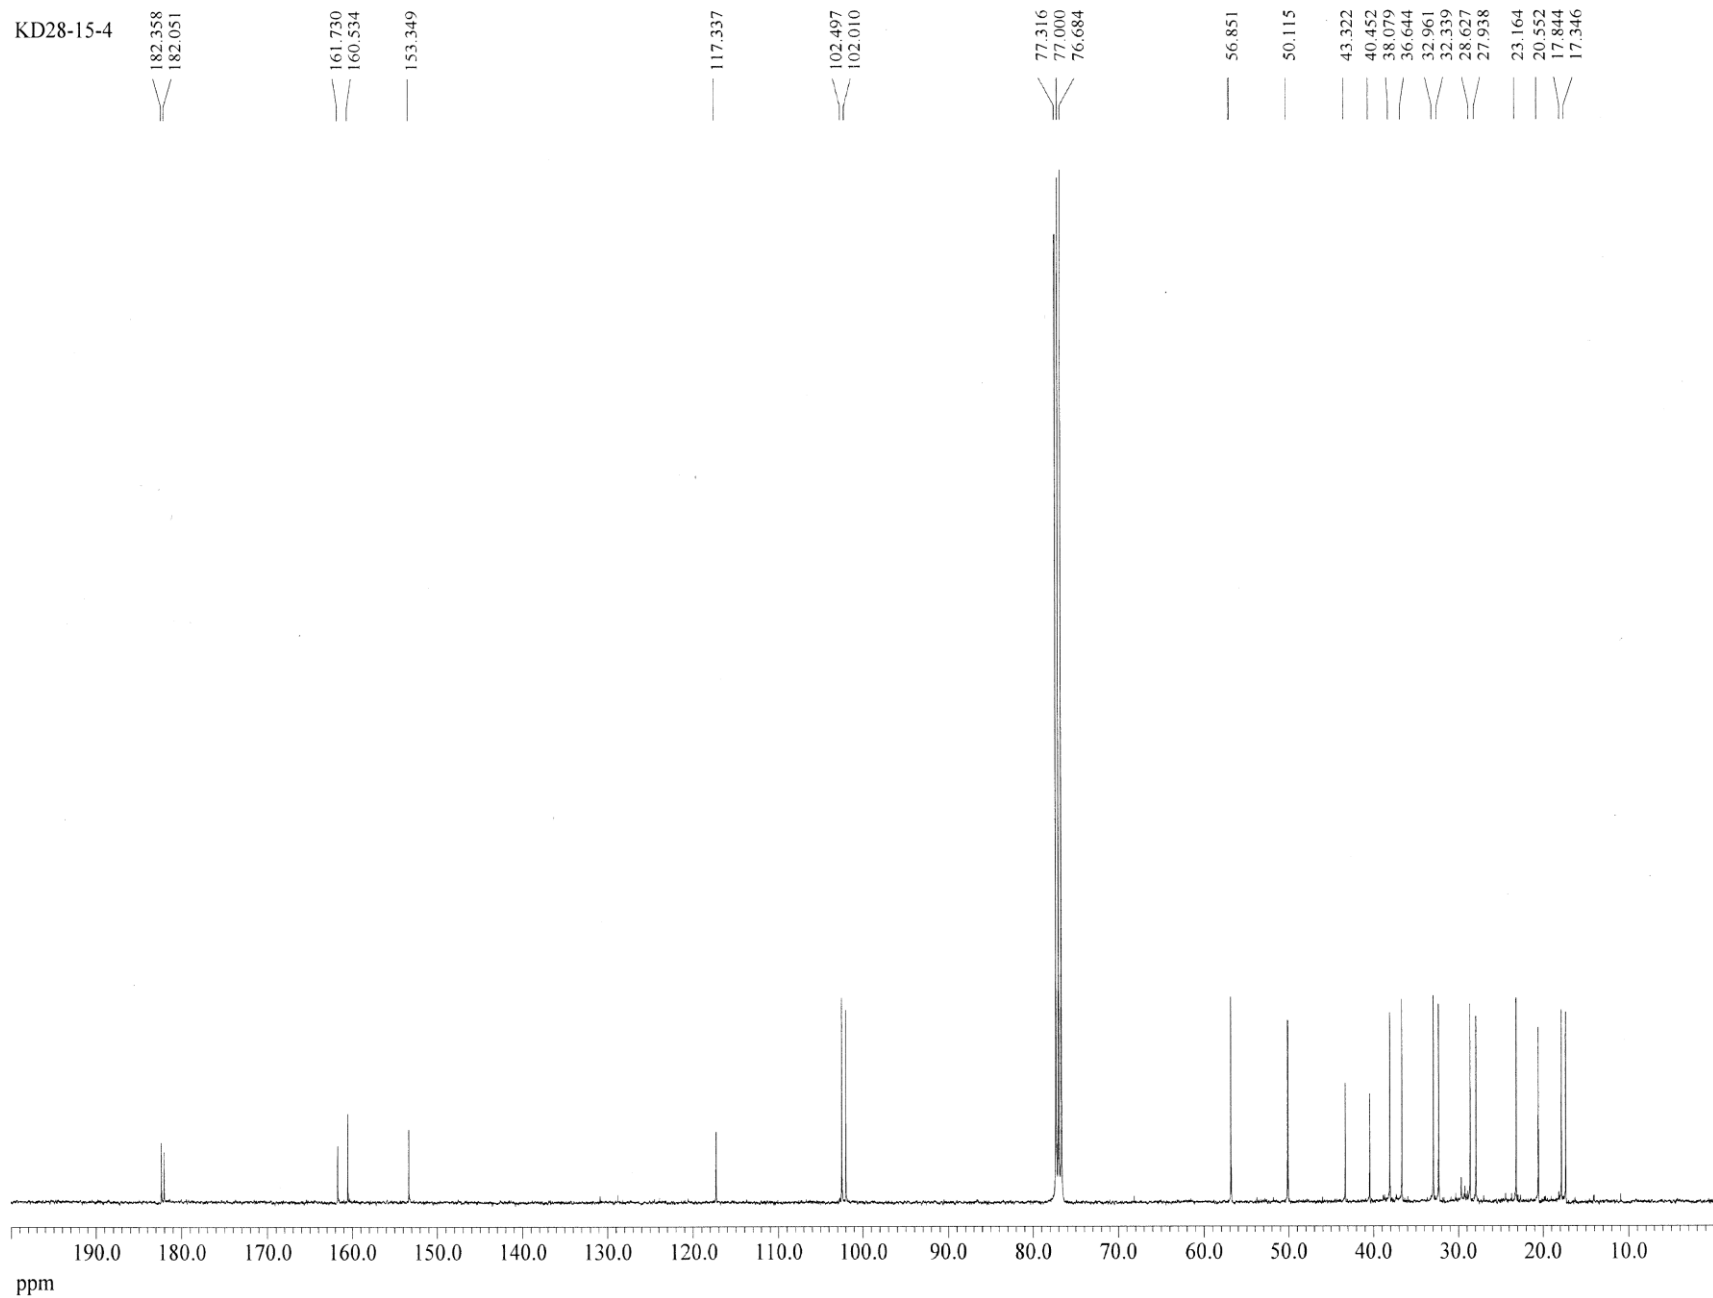

S2.  $^{13}\text{C}$  NMR spectrum of ilimaquinone in  $\text{CDCl}_3$  at 100 MHz.

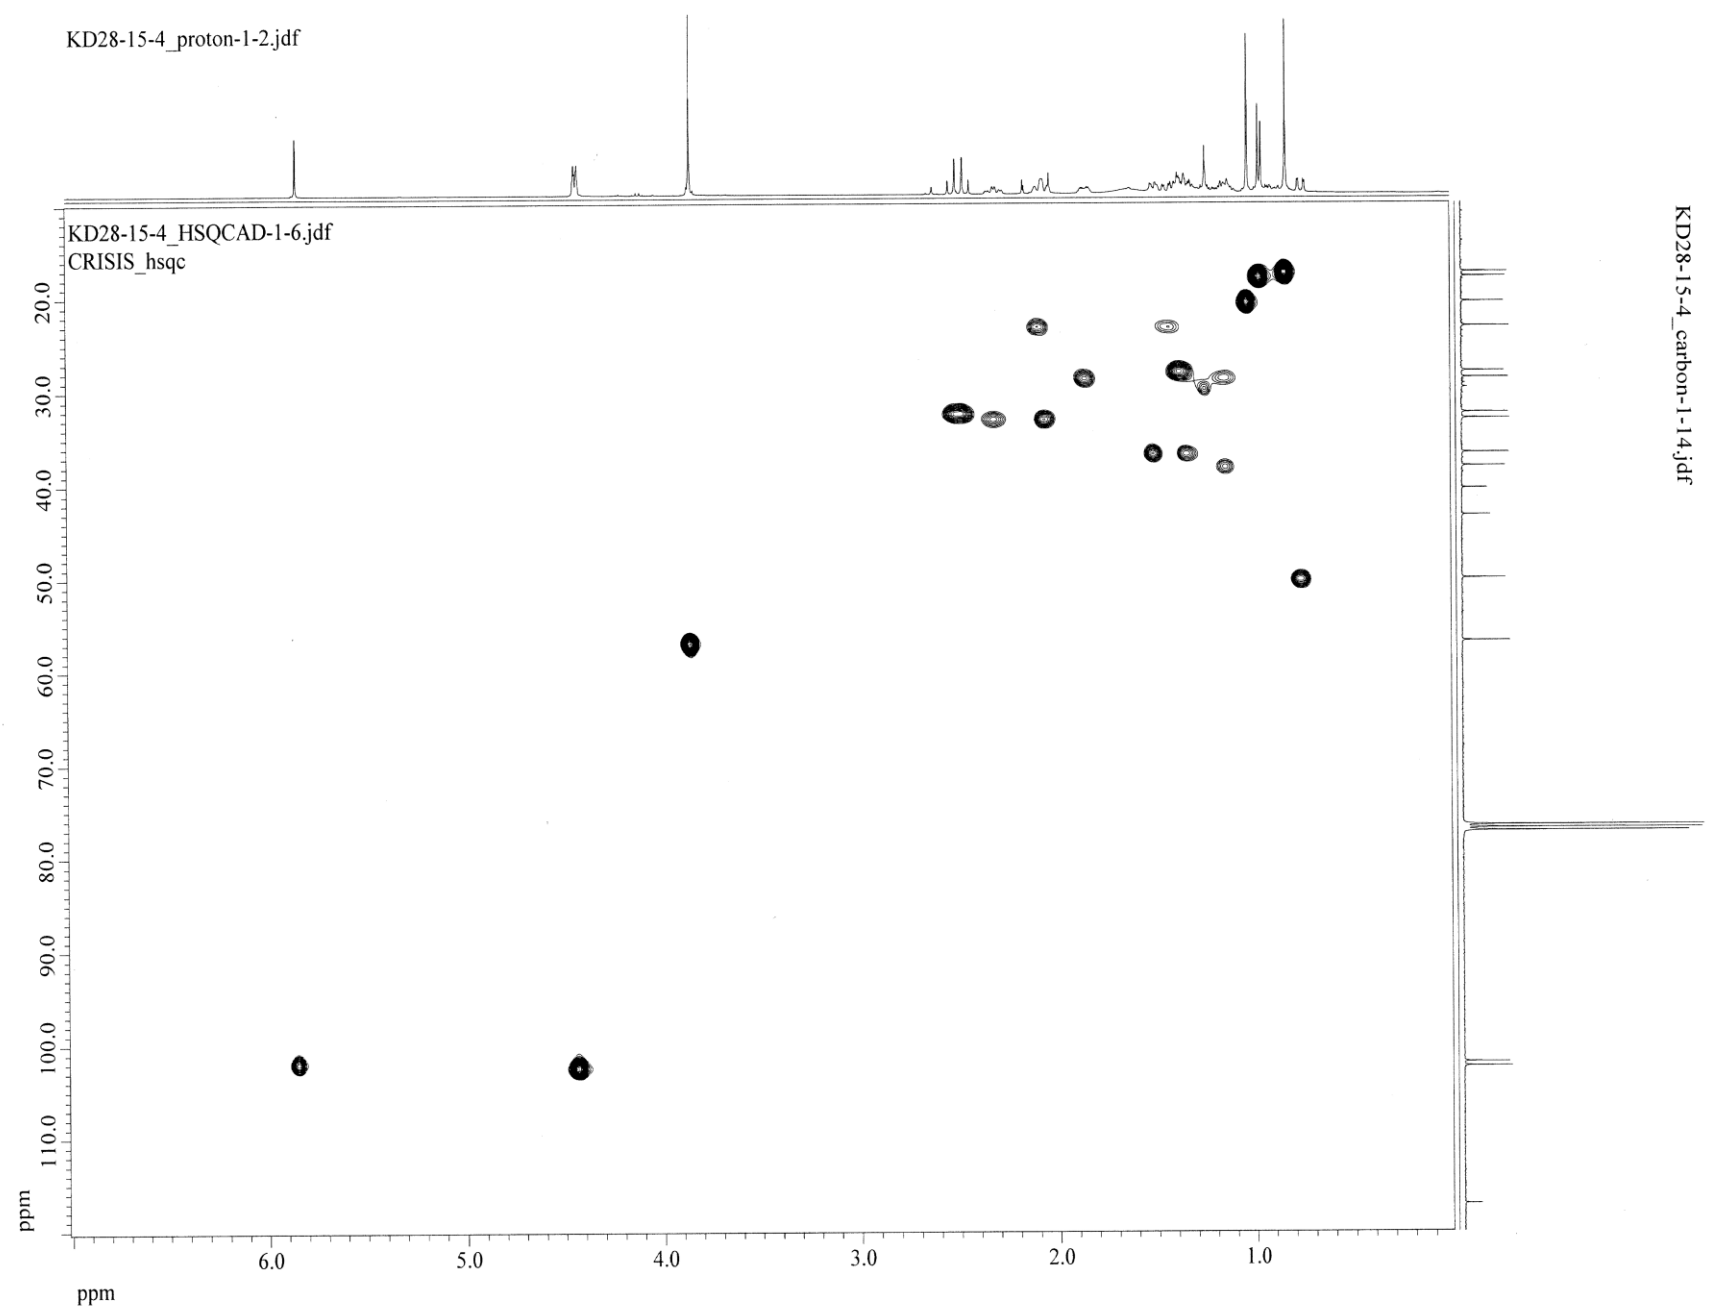

S3. HSQC spectrum of ilimaquinone in  $\text{CDCl}_3$ .

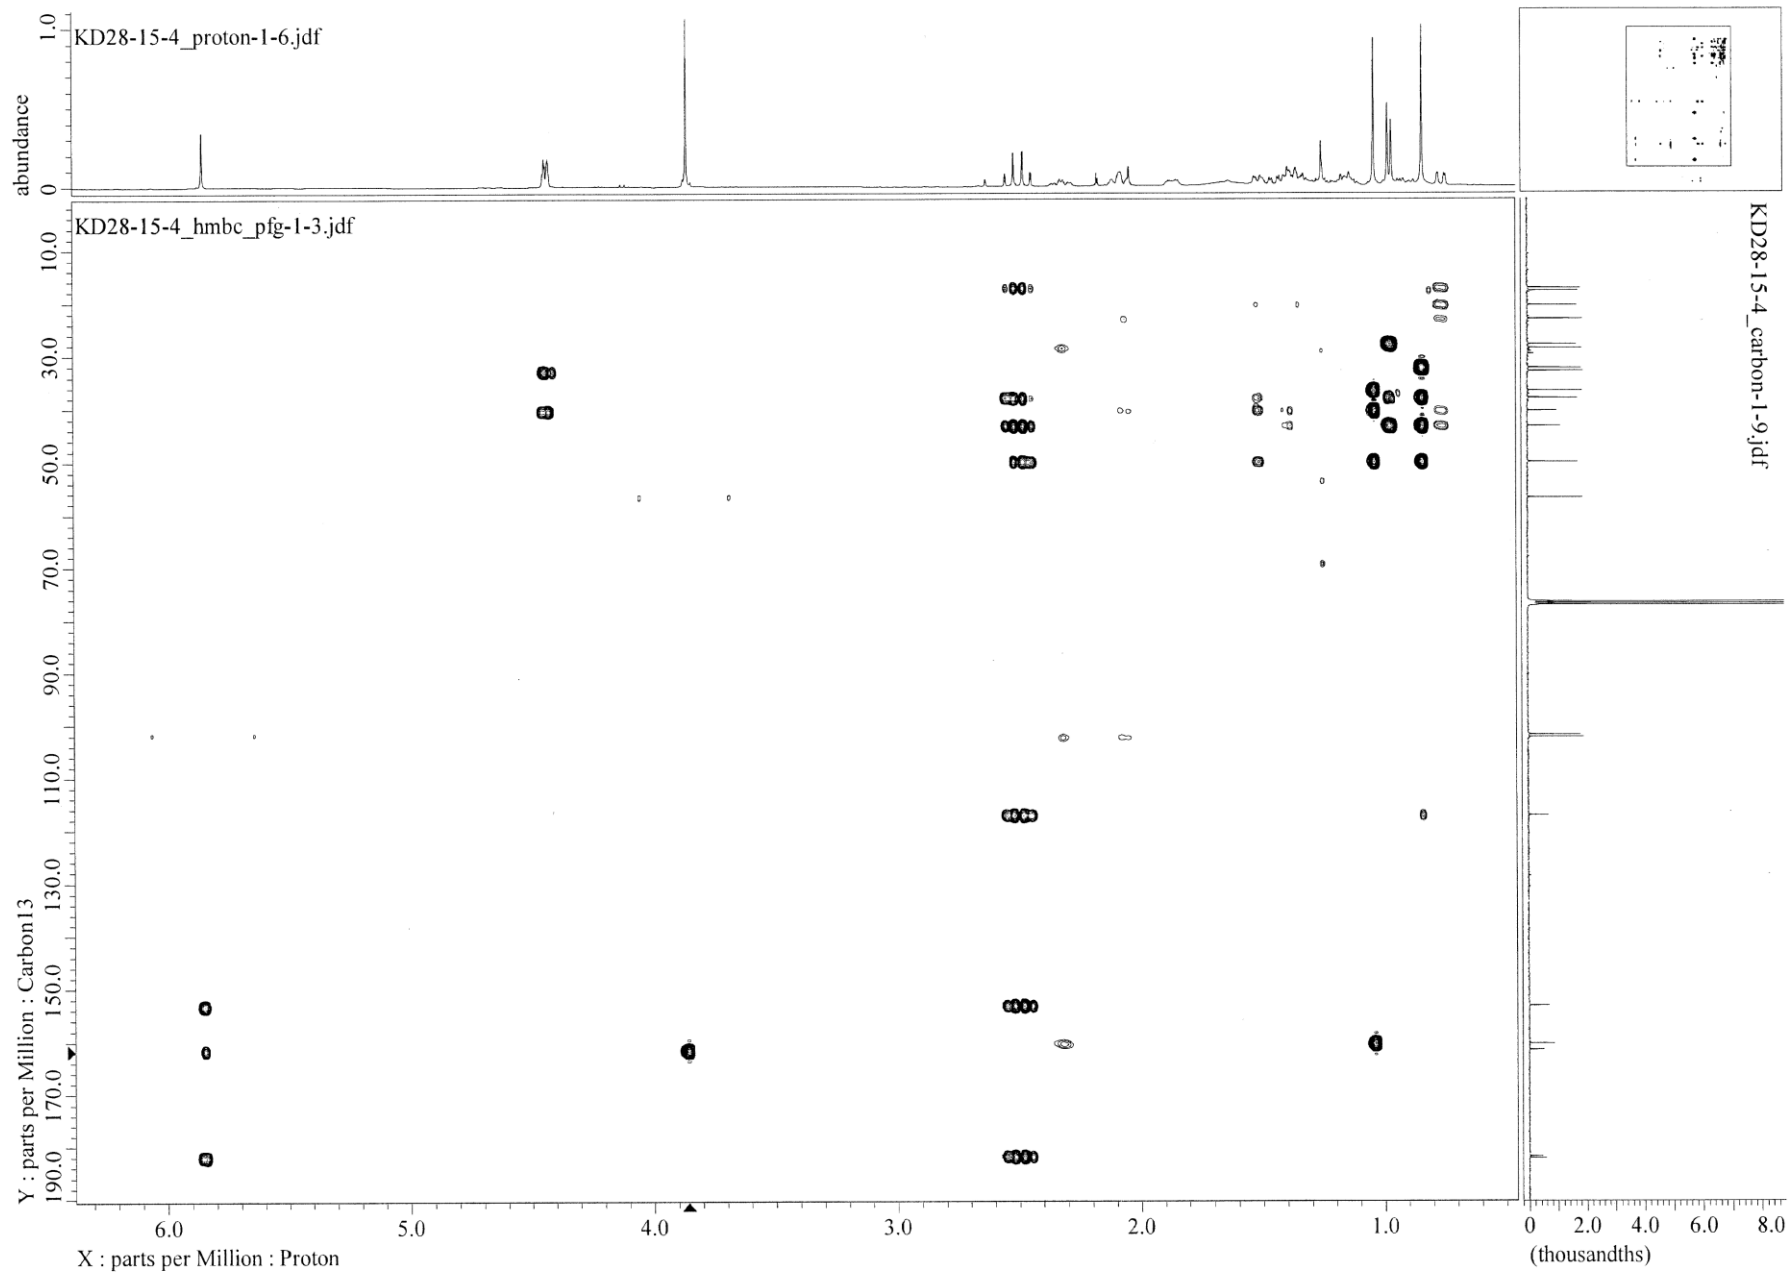

**S4.** HMBC spectrum of ilimaquinone in CDCl<sub>3</sub>.

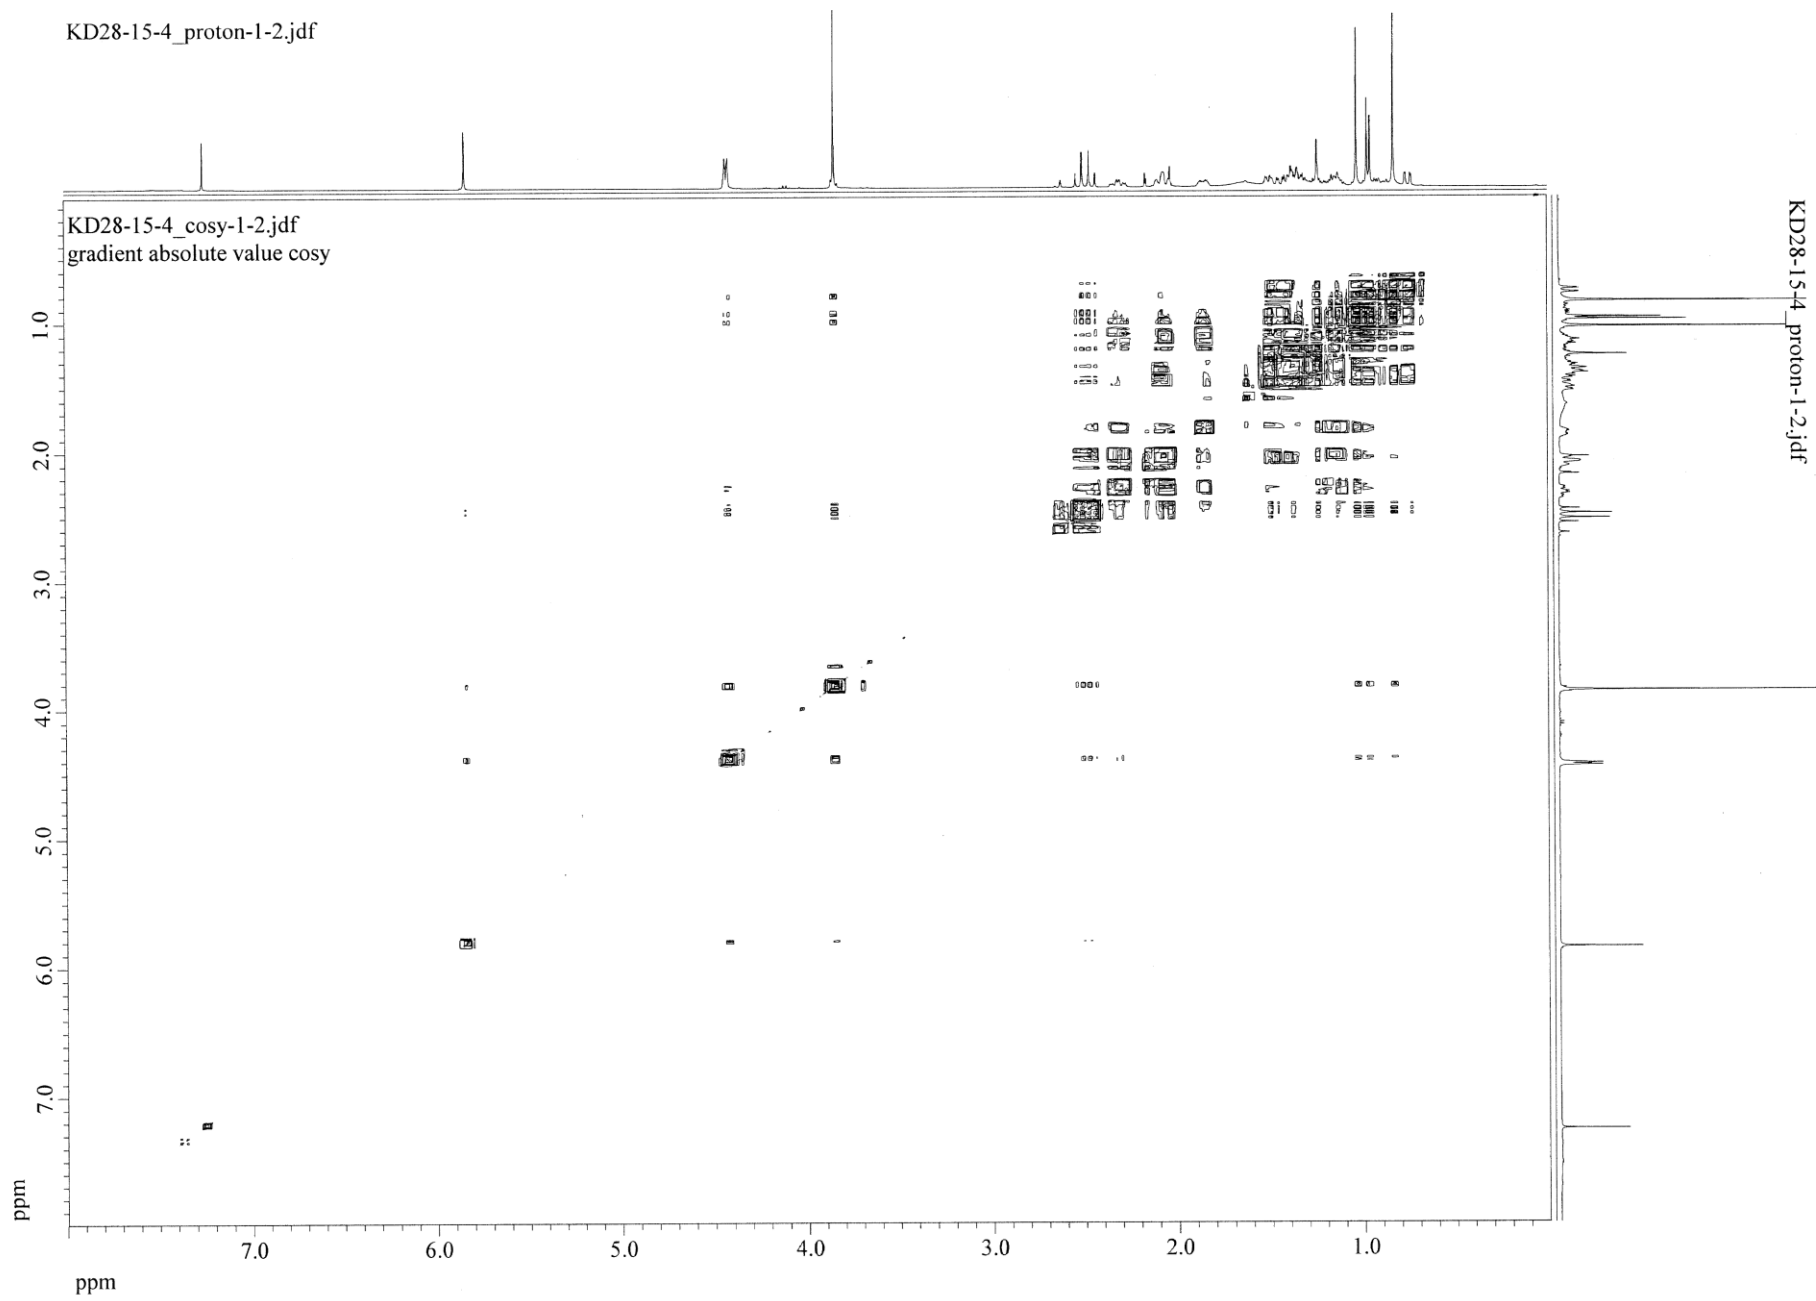

S5.  $^1\text{H}$ - $^1\text{H}$  COSY spectrum of ilimaquinone in  $\text{CDCl}_3$ .
